# Supplementary material
Source: Research Square preprint supplement (doi:10.21203/rs.3.rs-9722320/v1)
Supplement: Supplementary file 1 [file aedaea784c4a4dea96255c5a.docx]

**
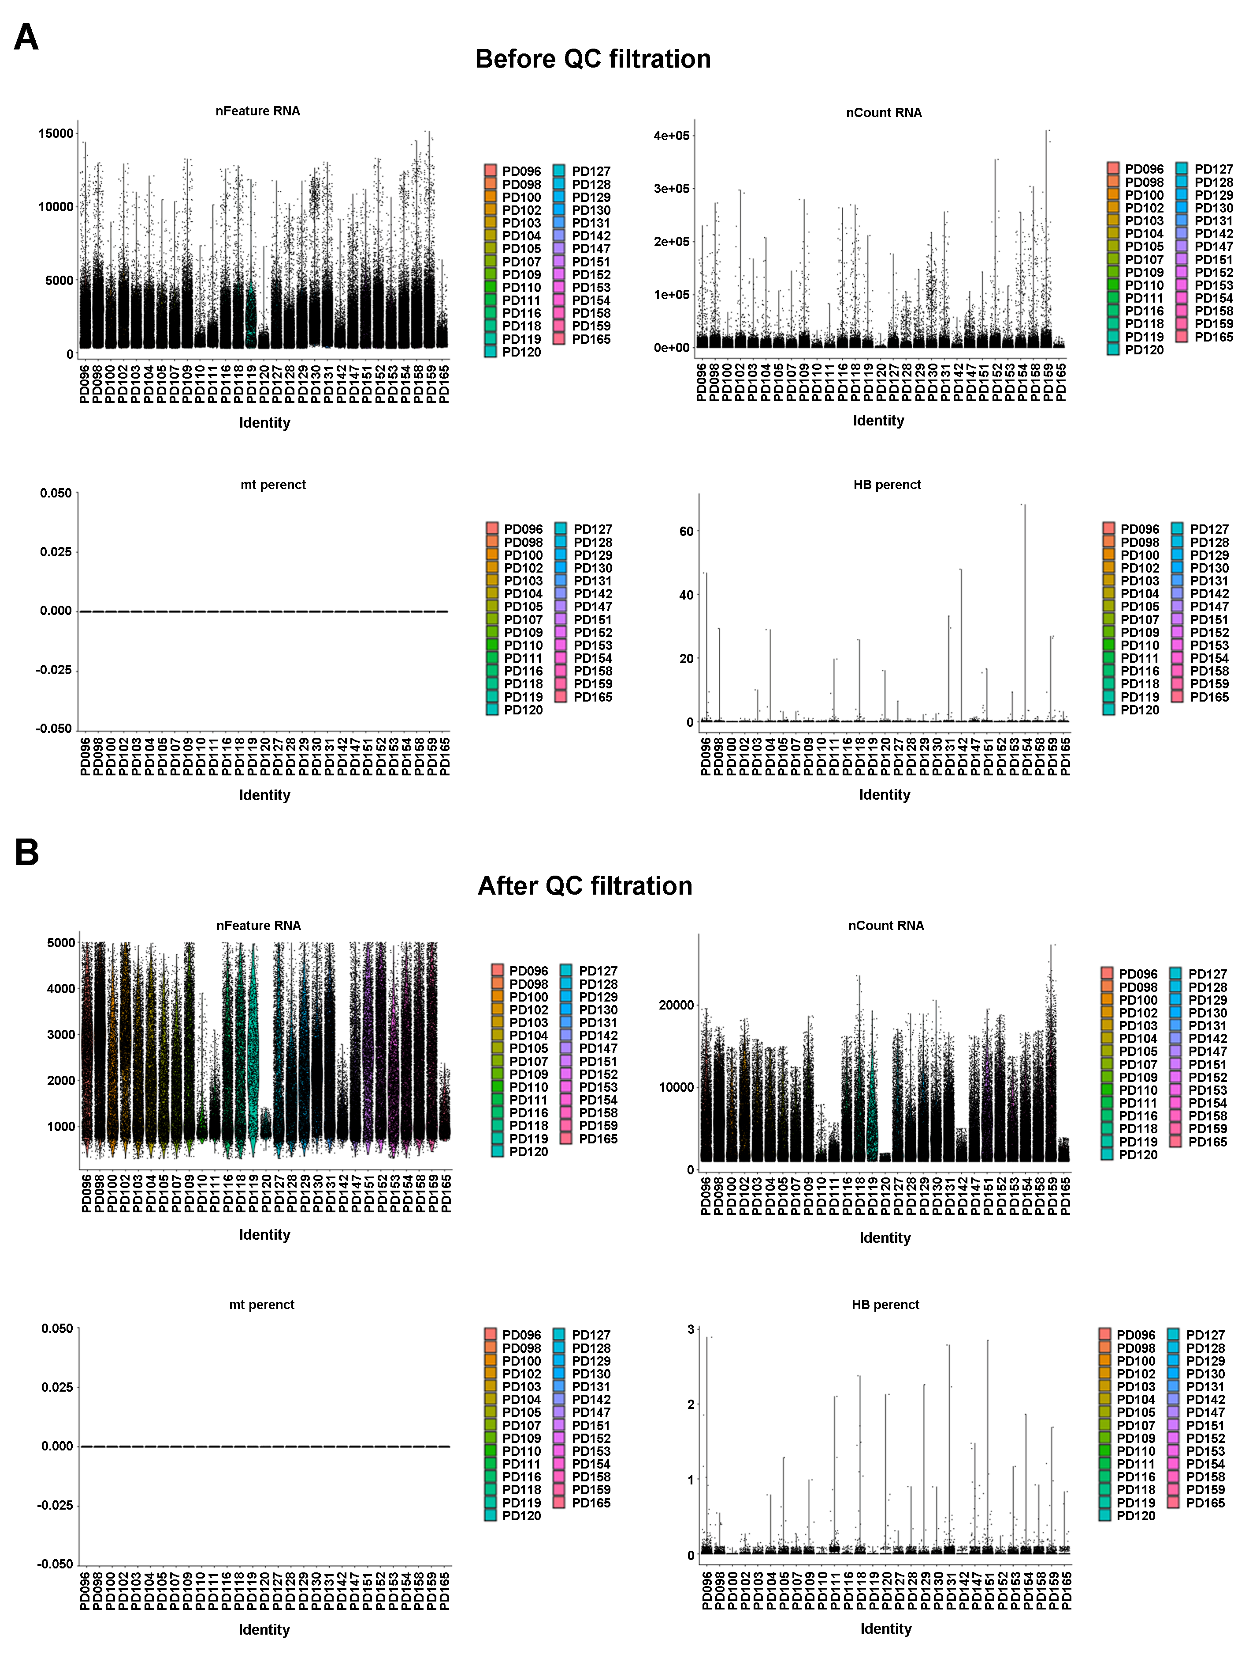
**

**Figure S1. Quality control of single-nucleus RNA-seq data.** (A) Distributions of detected genes per nucleus and total UMI counts before and after quality control filtering. (B) Proportions of mitochondrial gene expression before and after quality control filtering.


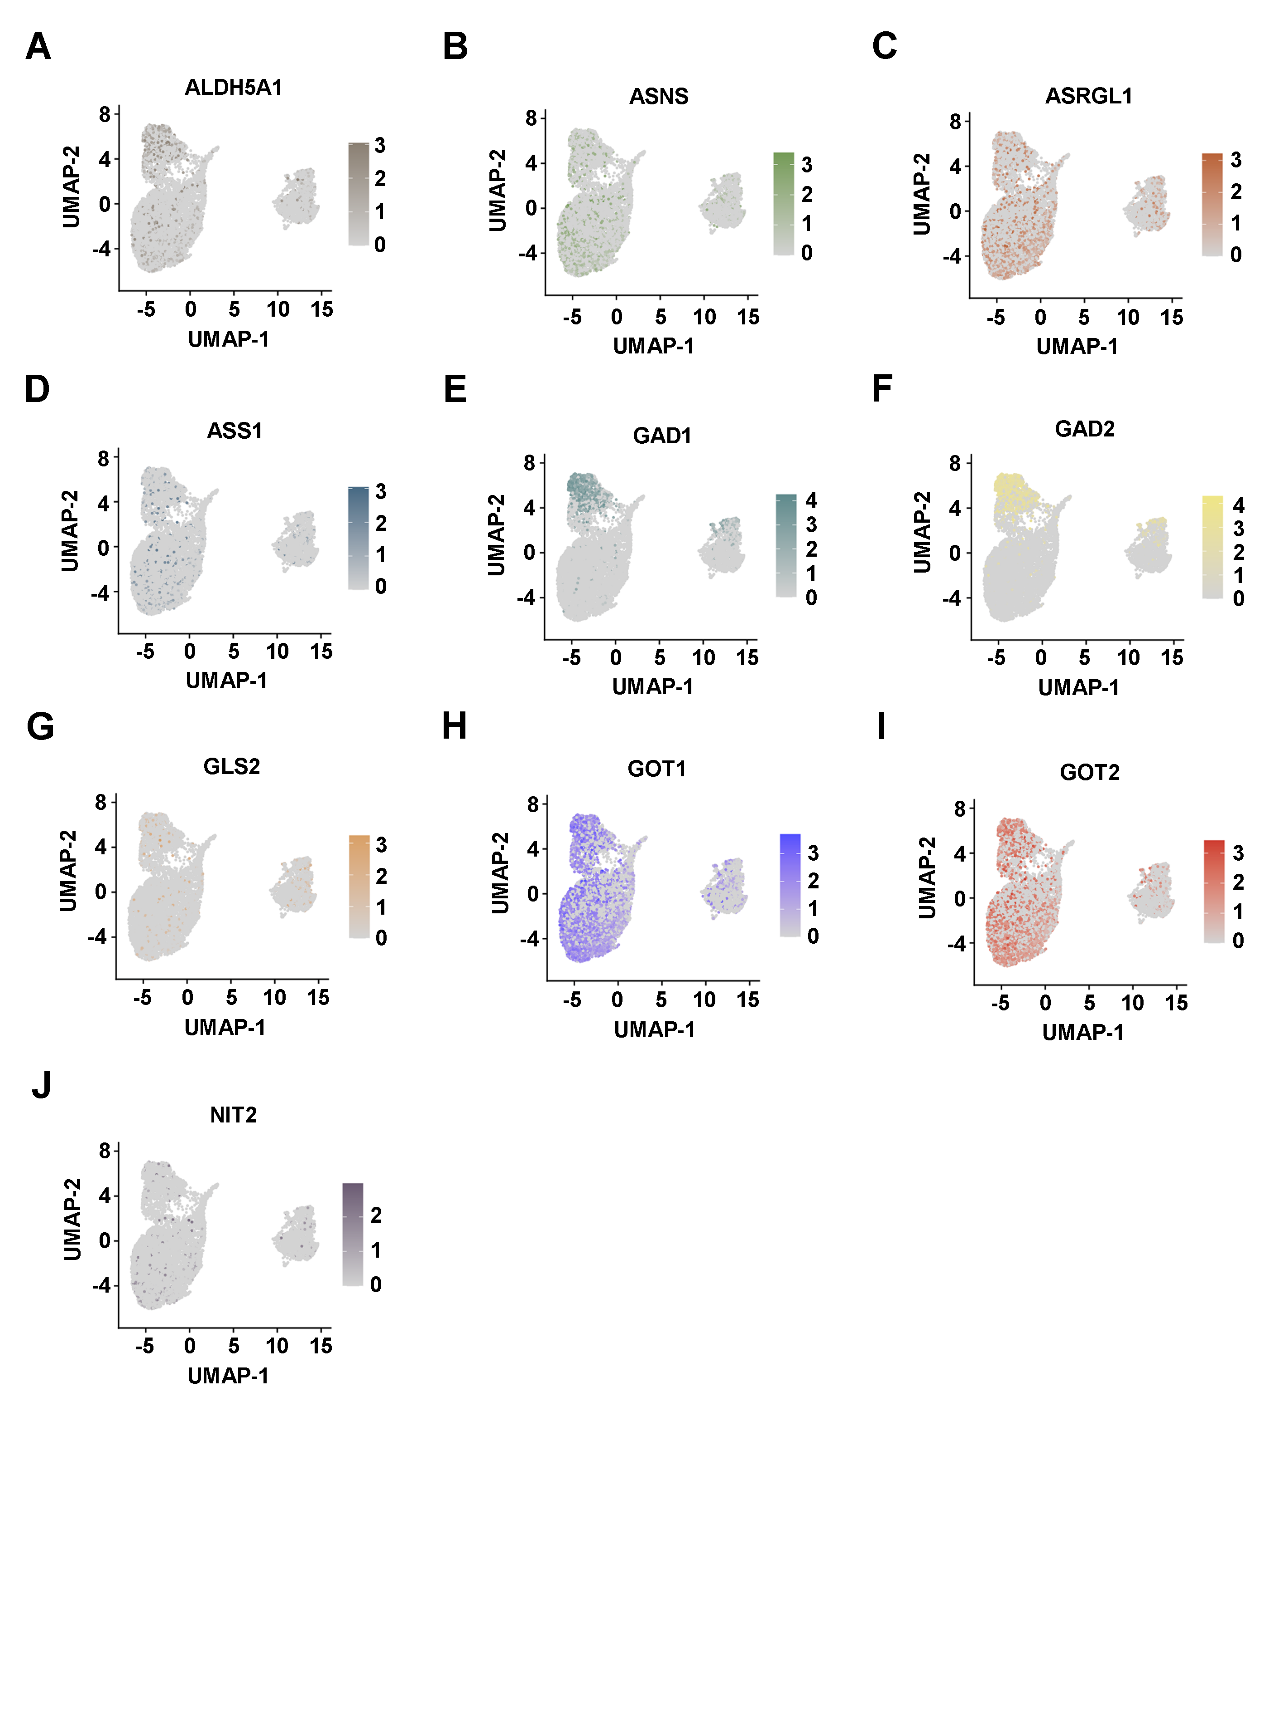


**Figure S2. Single-cell expression of alanine, aspartate and glutamate metabolism–related genes in neuronal populations.** (A–J) UMAP projections of neuronal single-cell transcriptomic data showing the expression of ALDH5A1 (A), ASNS (B), ASRGL1 (C), ASS1 (D), GAD1 (E), GAD2 (F), GLS2 (G), GOT1 (H), GOT2 (I), and NIT2 (J). Color intensity represents normalized gene expression levels across individual neuronal cells.


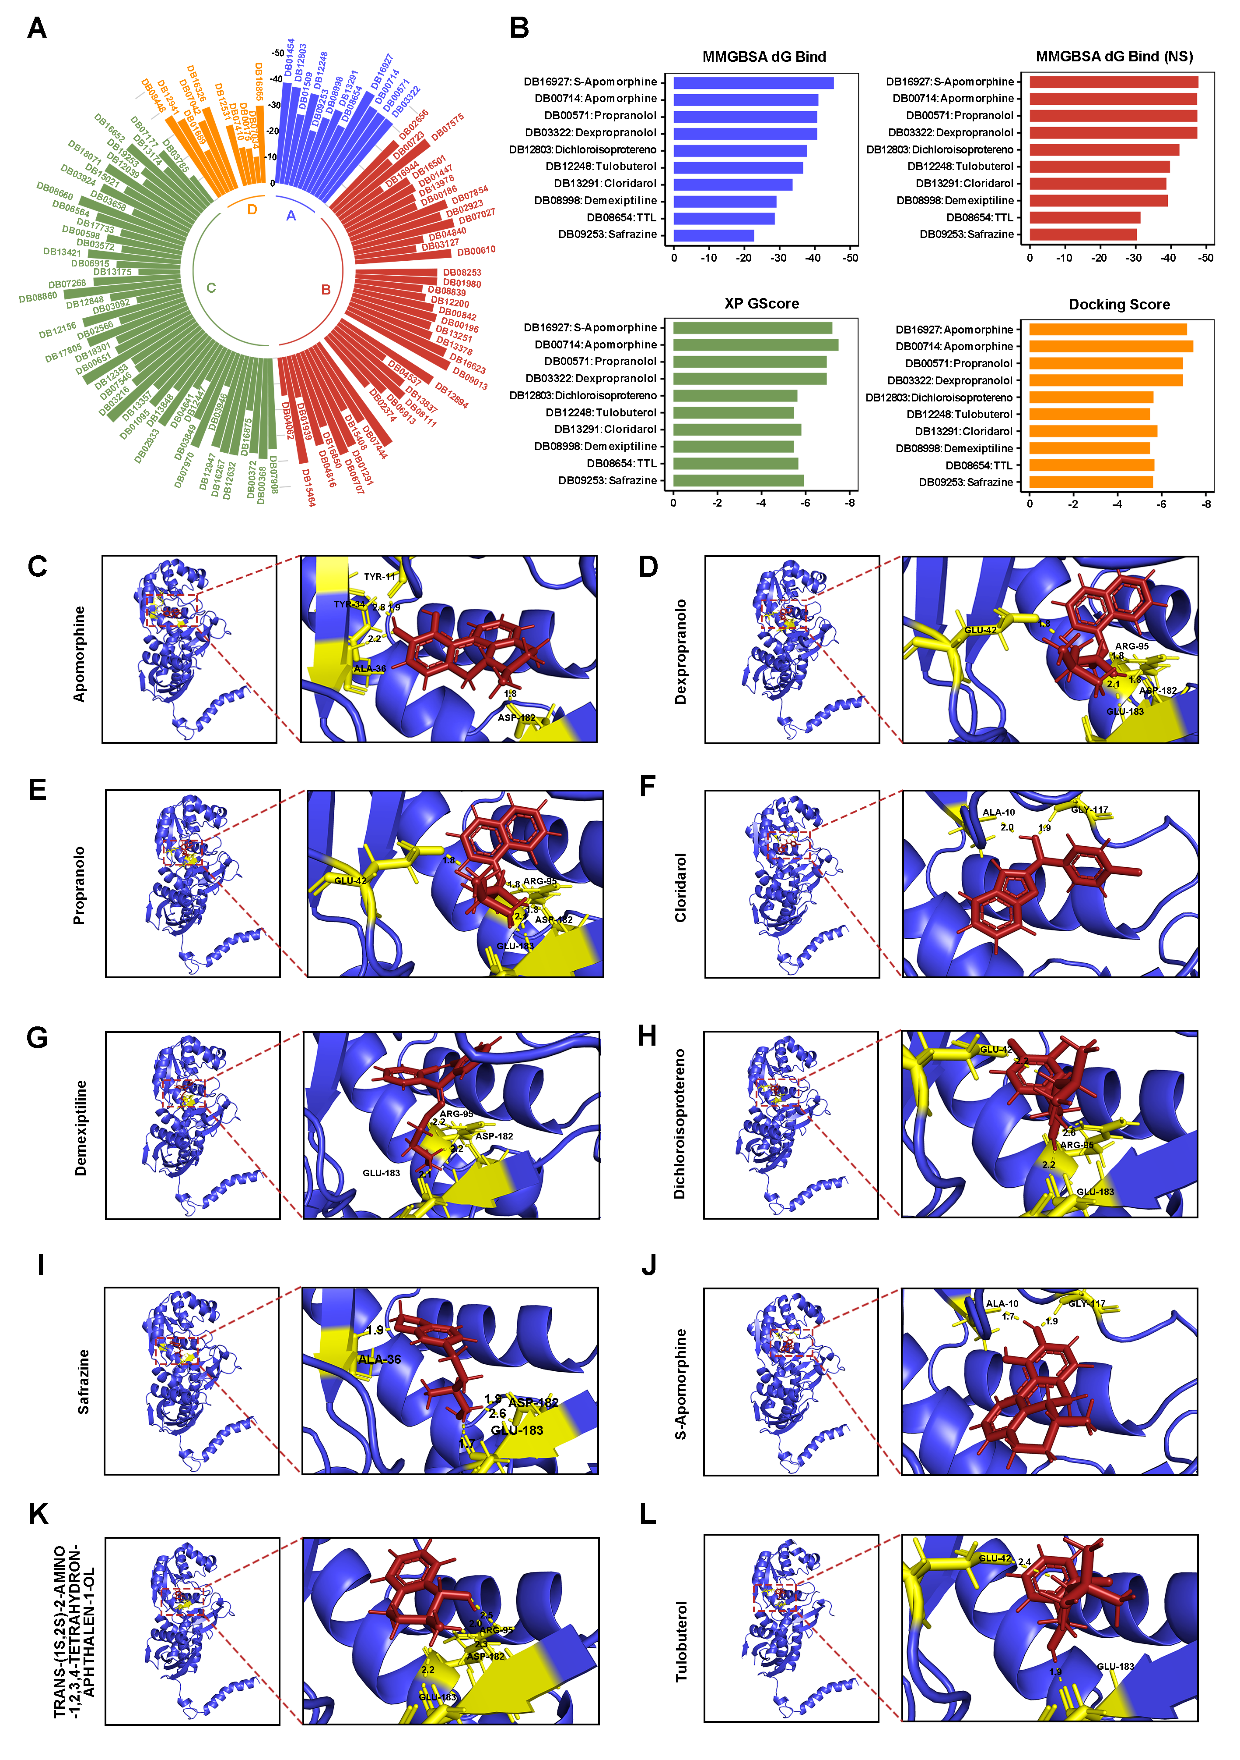


**Figure S3. Virtual screening identifies candidate compounds with predicted binding to the ASS1 allosteric pocket.** (A) Circular bar plot of 114 ligands with MM-GBSA ΔG_bind < –10 kcal/mol, grouped by predicted blood–brain barrier permeability (QPlogBB) and colored by group. (B) Comparative bar plot showing MM-GBSA binding energies, XP GScores and docking scores for 10 selected candidate compounds. (C–L) Docking poses of the 10 selected compounds in the docking grid of ASS1.

**
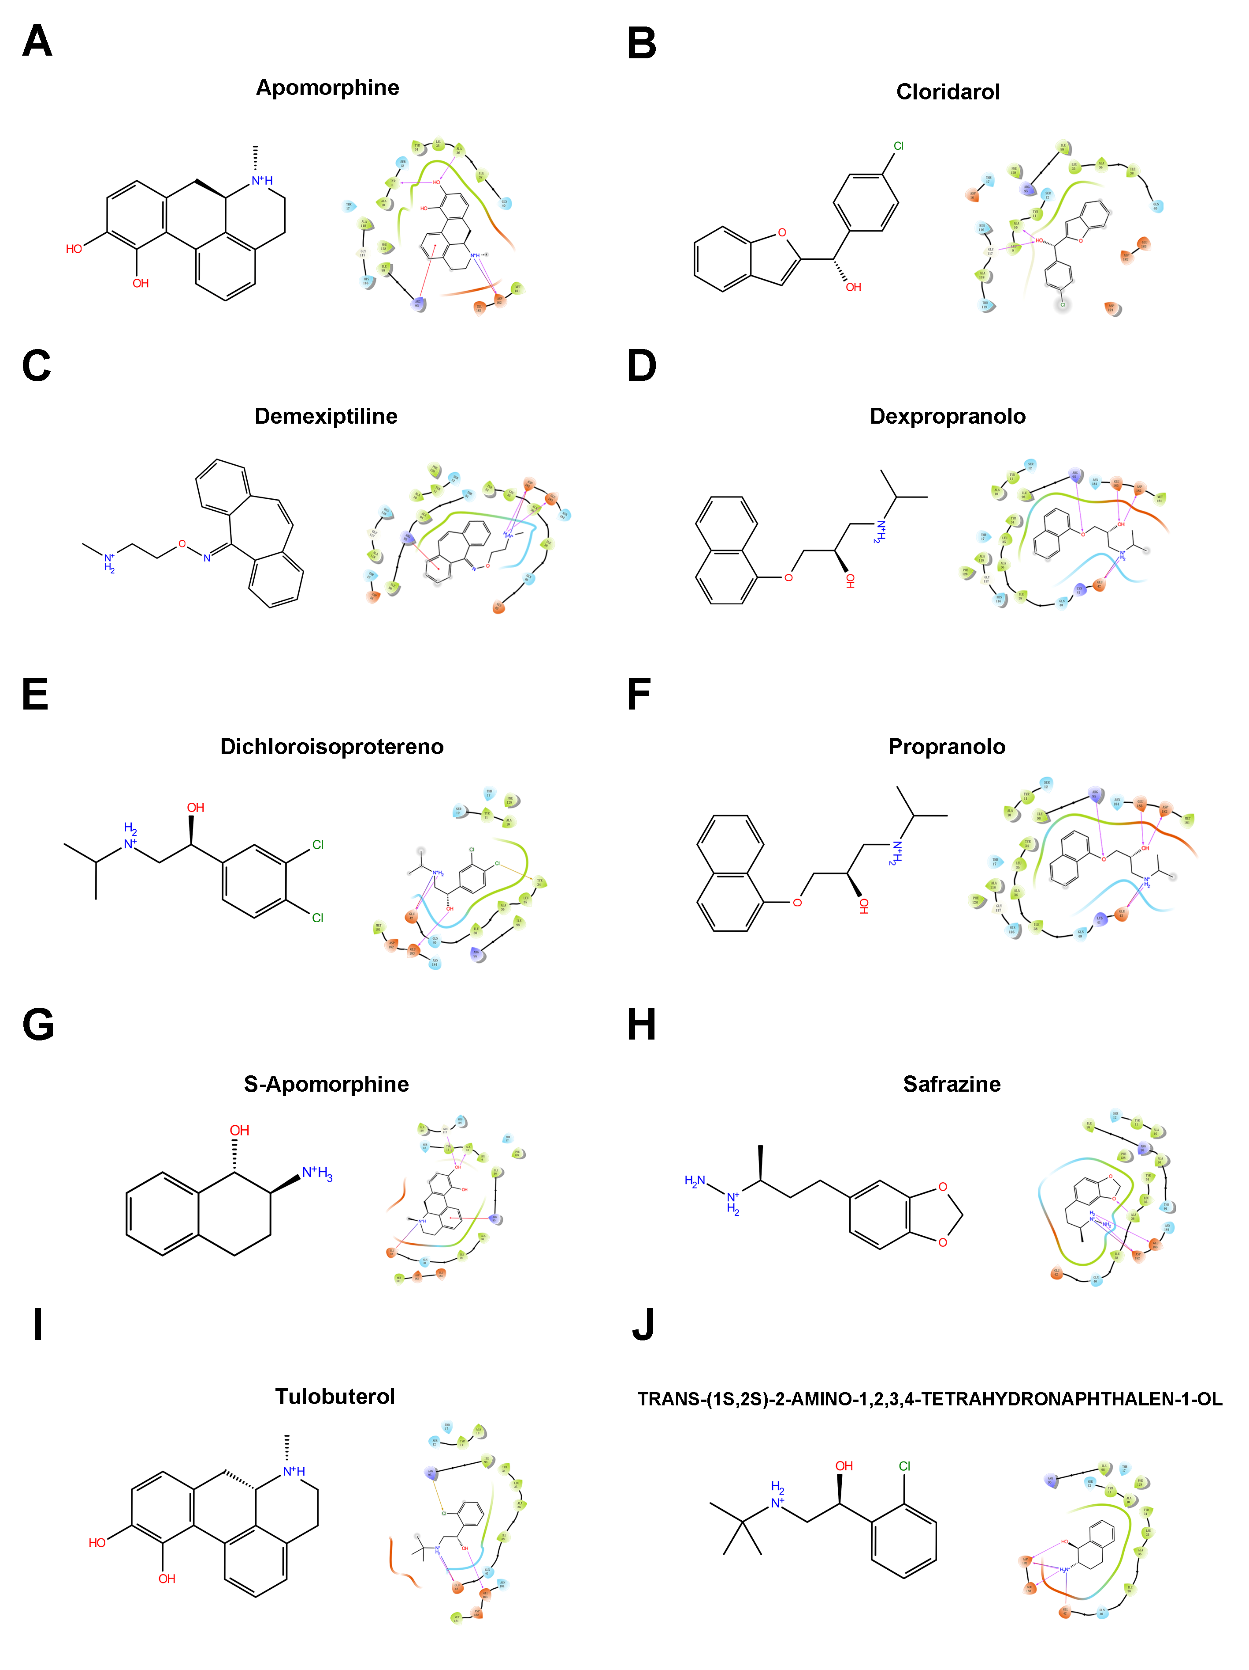
**

**Figure S4. Two-dimensional structures and docking interactions of ASS1 candidate compounds.** (A–J) Two-dimensional chemical structures and corresponding 2D ligand–protein interaction diagrams of Apomorphine (A), S-Apomorphine (B), Propranolol (C), Dexpropranolol (D), Tulobuterol (E), Demexiptiline (F), Dichloroisoproterenol (G), Cloridarol (H), TRANS-(1S,2S)-2-AMINO-1,2,3,4-TETRAHYDRONAPHTHALEN-1-OL (I), and Safrazine (J) docked into the ASS1 docking grid. Key interacting residues and interaction types are indicated.
