# Supplementary material
Source: Research Square preprint supplement (doi:10.21203/rs.3.rs-9722320/v1)

Figure 7B

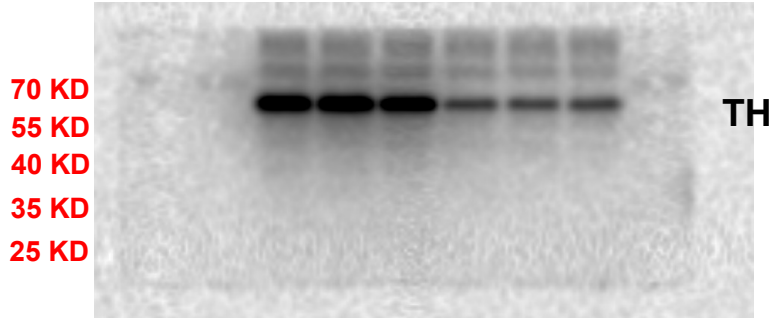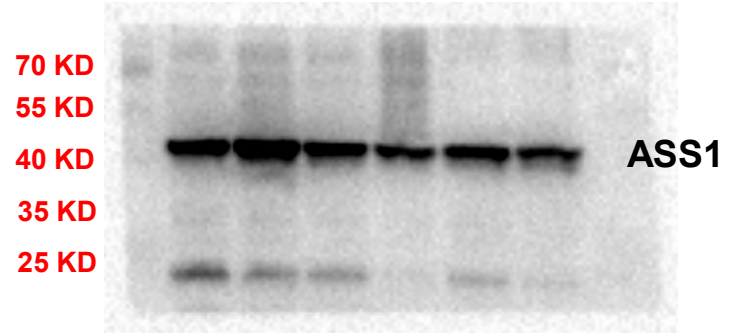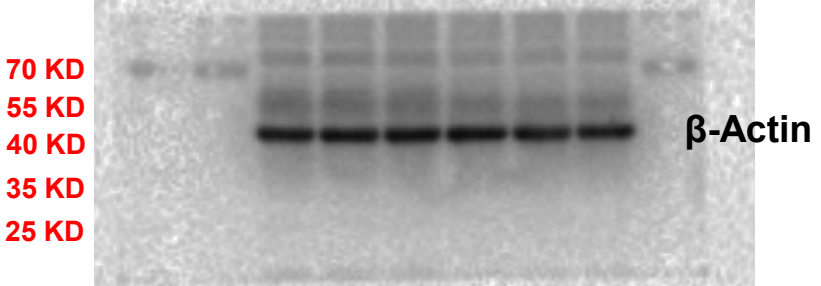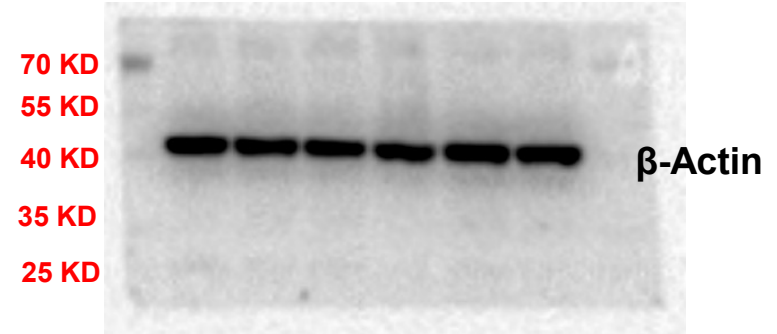

Figure 7J

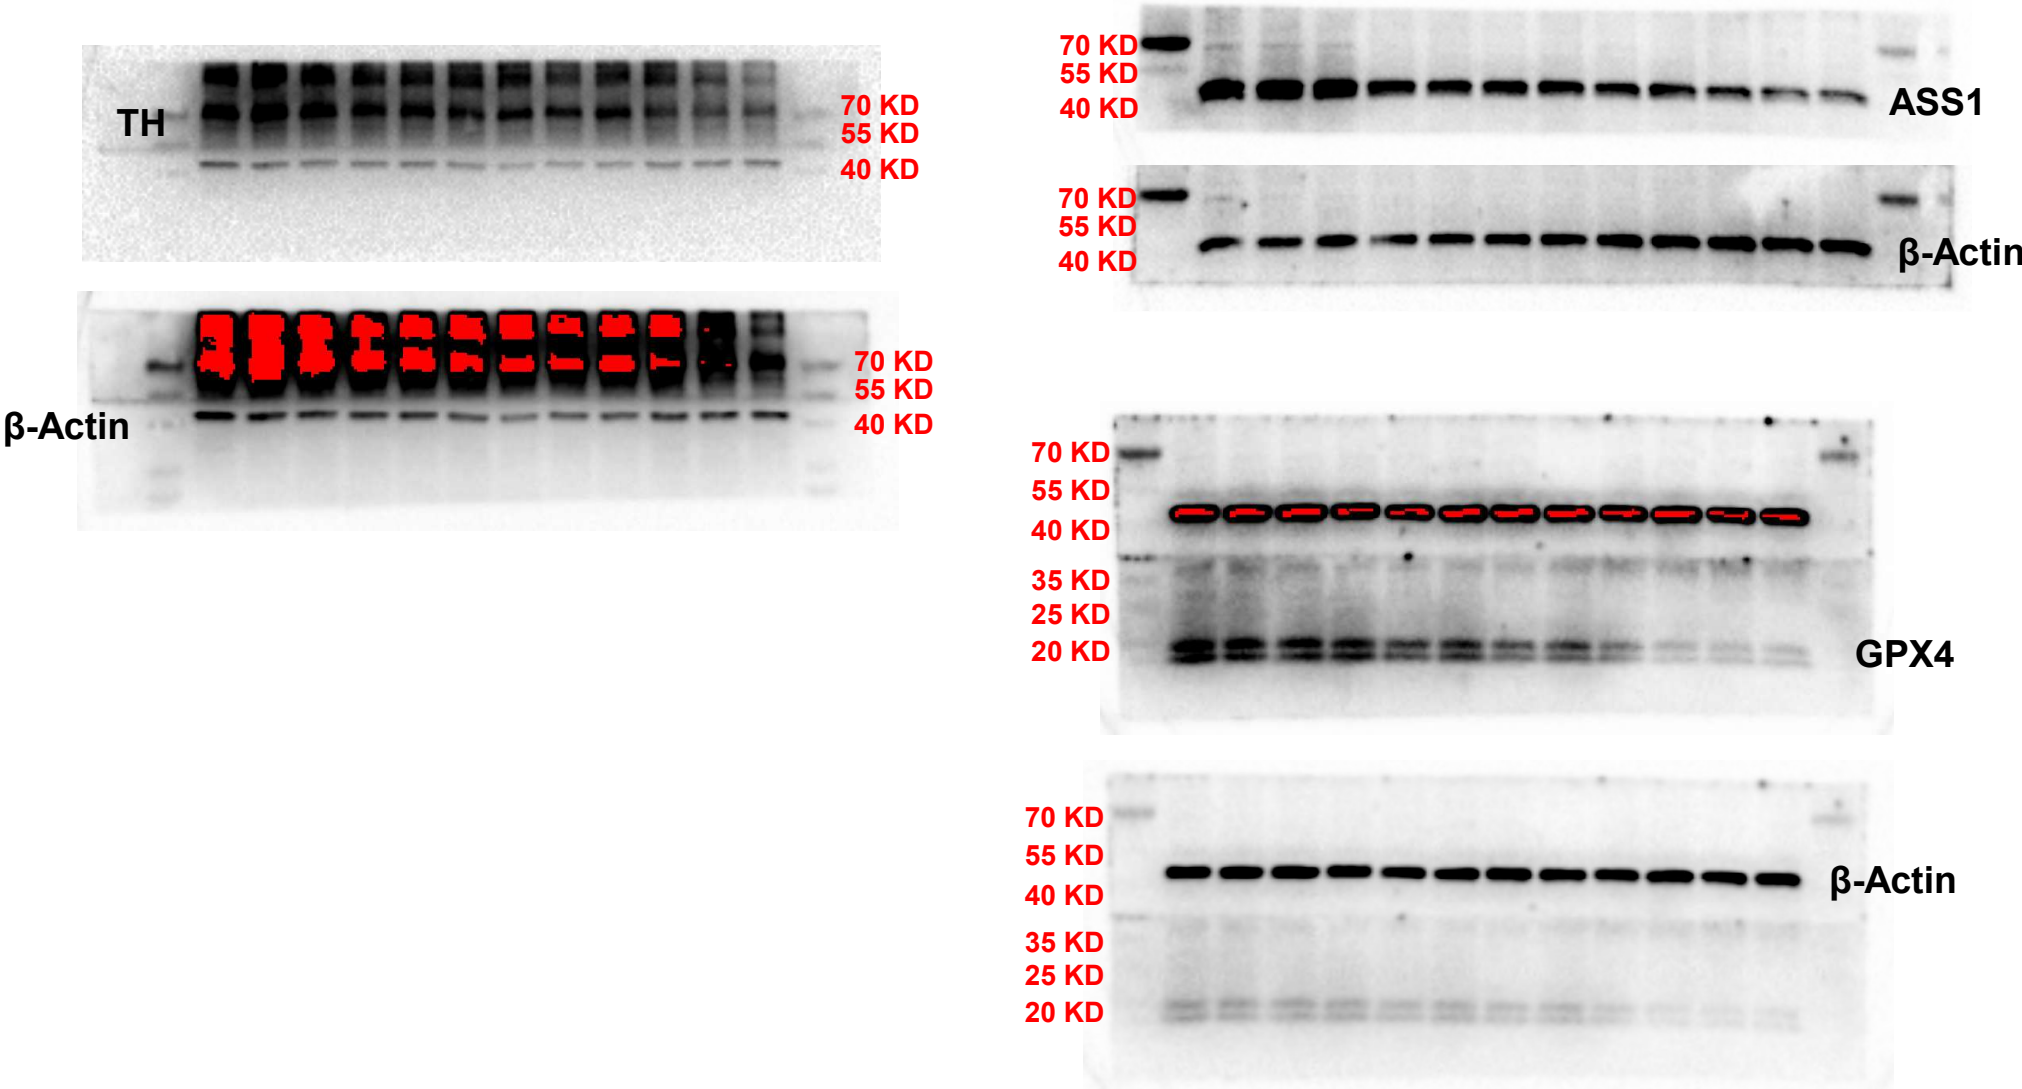

Supplement: Supplementary file 2 [file cfba15b8d24bbc45cf97f701.pdf]
